# Supplementary material for: Asymmetric inheritance of centrosomes maintains stem cell properties in human neural progenitor cells
Source: eLife. 2023 Oct 26;12:e83157. doi: 10.7554/eLife.83157 (PMC10629821; doi:10.7554/eLife.83157)
Supplement: Figure 2—source data 1. [file elife-83157-fig2-data1.xlsx]

## Sheet: Figure 2-source data 1
Related to Figure 2G-H
image	vent green	vent yellow	vent orange	nonvent green	nonvent yellow	nonvent orange
1	3	6	2	3	4	2		Manual counts for each centrosome colour in each region (vent vs nonvent) for each image.
2	3	0	1	4	6	1
3	6	11	6	9	11	0
4	6	1	1	12	3	3
5	0	3	3	4	5	0
6	5	3	0	6	3	0
7	8	20	4	8	8	4
8	0	1	1	2	2	0
9	4	12	11	7	5	4
10	3	6	4	9	9	4
11	0	1	1	2	2	0
12	0	1	1	1	7	1
13	3	4	1	2	1	0
14	2	3	0	1	1	1
15	0	2	0	0	2	0
16	0	1	1	2	2	1
17	1	2	1	4	3	2
18	3	7	4	7	5	1
19	1	2	2	3	0	0
20	2	4	3	2	1	0
21	2	0	0	6	4	3
22	2	6	0	2	4	4
