# Supplementary material for: Asymmetric inheritance of centrosomes maintains stem cell properties in human neural progenitor cells
Source: eLife. 2023 Oct 26;12:e83157. doi: 10.7554/eLife.83157 (PMC10629821; doi:10.7554/eLife.83157)
Supplement: Figure 2—source data 2. [file elife-83157-fig2-data2.xlsx]

## Sheet: Figure 2-source data 2
Related to Figure 2-figure supplement 1C
Image	region	Mean ratio of NeonGreen to total signal
1	nonvent	0.594106		Ratio of signal intensity of NeonGreen to total signal intensity averaged for each region (vent & nonvent) of each image
1	vent	0.61992		NeonGreen & tdTomato signals were corrected for local background and normalised to the maximum
2	nonvent	0.652812
2	vent	0.590875
3	nonvent	0.680102
3	vent	0.642519
4	nonvent	0.669636
4	vent	0.525728
5	nonvent	0.680332
5	vent	0.406193
6	nonvent	0.744736
6	vent	0.569106
7	nonvent	0.638054
7	vent	0.613373
8	nonvent	0.5558
8	vent	0.493994
9	nonvent	0.486309
9	vent	0.431011
10	nonvent	0.539173
10	vent	0.467443
11	nonvent	0.596307
11	vent	0.612396
12	nonvent	0.599457
12	vent	0.513791
13	nonvent	0.658552
13	vent	0.582764
14	nonvent	0.595435
14	vent	0.561745
15	nonvent	0.684359
15	vent	0.680679
16	nonvent	0.702626
16	vent	0.478362
17	nonvent	0.603754
17	vent	0.628543
18	nonvent	0.577979
18	vent	0.559445
19	nonvent	0.614054
19	vent	0.559846
20	nonvent	0.68224
20	vent	0.526617
