# Supplementary material for: Asymmetric inheritance of centrosomes maintains stem cell properties in human neural progenitor cells
Source: eLife. 2023 Oct 26;12:e83157. doi: 10.7554/eLife.83157 (PMC10629821; doi:10.7554/eLife.83157)
Supplement: Figure 2—source data 3. [file elife-83157-fig2-data3.xlsx]

## Sheet: Figure 2-source data 3
Related to Figure 2-figure supplement 1D-E
image	vent green	vent yellow	vent orange	nonvent green	nonvent yellow	nonvent orange
1	3	10	1	3	3	3		Automatic centrosome colour counts for each centrosome colour in each region (vent vs nonvent) for each image.
2	3	0	1	8	2	1		Centrosomes were assigned colour based on their ratio of NeonGreen to total signal.
3	10	13	1	14	5	0		Centrosomes in the upper 3rd being assigned green, median 3rd being assigned yellow and the lower 3rd being assign red.
4	4	5	7	11	4	3
5	0	0	6	4	2	0
6	4	3	4	6	2	1
7	13	14	7	10	4	4
8	0	1	1	1	1	2
9	0	3	24	0	3	13
10	1	4	14	3	8	11
11	1	1	0	2	0	2
12	0	1	1	5	3	3
13	1	7	0	2	0	0
14	0	3	1	2	0	1
15	2	0	0	1	1	0
16	0	0	2	4	0	0
17	2	1	1	4	6	1
18	2	8	5	2	6	1
19	0	3	2	2	1	0
20	0	2	7	2	0	0
