# Supplementary material for: Asymmetric inheritance of centrosomes maintains stem cell properties in human neural progenitor cells
Source: eLife. 2023 Oct 26;12:e83157. doi: 10.7554/eLife.83157 (PMC10629821; doi:10.7554/eLife.83157)
Supplement: Figure 3—source data 1. [file elife-83157-fig3-data1.xlsx]

## Sheet: Figure 3-source data 1
Related to Figure 3-figure supplement 1D
shrna	replicate	mean ninein signal (background corrected, normalised to max of each replicate)
SCRAM	1	0.304975
SCRAM	2	0.565905			Signal intensity of NIN averaged for each replicate of each shRNA condition (SCRAM & NIN)
SCRAM	3	0.581539			Ninein signal was background corrected and normalised to the maximum of each replicate
NIN	1	0.170102			Each replicate consisted of 5 images.
NIN	2	0.295392
NIN	3	0.227042
