# Supplementary material for: Asymmetric inheritance of centrosomes maintains stem cell properties in human neural progenitor cells
Source: eLife. 2023 Oct 26;12:e83157. doi: 10.7554/eLife.83157 (PMC10629821; doi:10.7554/eLife.83157)
Supplement: Figure 3—source data 2. [file elife-83157-fig3-data2.xlsx]

## Sheet: Figure 3-source data 2
Related to Figure 3-figure supplement 1F
shrna SCRAM	shrna NIN
0.272589	0.147033				Signal intensity of GFP-Ninein divided by signal intensity of Pericentrin. Each value is one H2B-CFP-positive cell.
0.167043	0.197528
0.285992	0.153554
1.23926	0.0999953
0.96654	0.0946502
2.52788	0.0757958
0.338879	0.056498
2.24781	0.10081
2.68421	0.902805
0.196576	0.494832
0.180212	0.287531
0.566181	0.128885
1.74954	0.17225
0.218878	0.238613
2.28529	0.108456
0.372592	0.141987
0.185015	0.599589
0.199655	0.170279
0.590487	0.171646
1.95527	0.211173
2.34889	0.156298
0.259181	0.159514
0.484661	0.331141
1.55158	0.199774
0.244325	0.0675352
4.20327	0.268461
0.245691	0.44086
0.729856	0.133427
1.24258	0.221485
3.71429	0.441785
