# Supplementary material for: Asymmetric inheritance of centrosomes maintains stem cell properties in human neural progenitor cells
Source: eLife. 2023 Oct 26;12:e83157. doi: 10.7554/eLife.83157 (PMC10629821; doi:10.7554/eLife.83157)
Supplement: Figure 3—source data 3. [file elife-83157-fig3-data3.xlsx]

## Sheet: Figure 3-source data 3
Related to Figure 3C-D
condition	no. CFP	no. SOX2	no. CTIP2	SOX2/CFP	CTIP2/CFP
NIN	31	17	6	0.548387	0.193548		Number of CFP+, SOX2, CTIP2+ manually counted cells in each image of each shRNA (NIN & SCRAM).
NIN	20	10	6	0.5	0.3		Ratios of then number of SOX2+ or CTIP2+ cells to the number of CFP+ cells are shown
NIN	17	4	4	0.235294	0.235294
NIN	25	11	3	0.44	0.12
NIN	28	4	6	0.142857	0.214286
NIN	6	2	3	0.333333	0.5
NIN	52	7	13	0.134615	0.25
NIN	36	18	13	0.5	0.361111
NIN	96	56	18	0.583333	0.1875
NIN	22	11	5	0.5	0.227273
NIN	32	11	21	0.34375	0.65625
SCRAM	38	21	6	0.552632	0.157895
SCRAM	45	34	0	0.755556	0
SCRAM	72	29	5	0.402778	0.0694444
SCRAM	63	25	5	0.396825	0.0793651
SCRAM	33	22	3	0.666667	0.0909091
SCRAM	9	4	1	0.444444	0.111111
SCRAM	94	48	7	0.510638	0.0744681
SCRAM	23	21	0	0.913043	0
SCRAM	49	35	6	0.714286	0.122449
SCRAM	57	43	4	0.754386	0.0701754
SCRAM	27	17	2	0.62963	0.0740741
