# Supplementary material for: Asymmetric inheritance of centrosomes maintains stem cell properties in human neural progenitor cells
Source: eLife. 2023 Oct 26;12:e83157. doi: 10.7554/eLife.83157 (PMC10629821; doi:10.7554/eLife.83157)
Supplement: Figure 4—source data 1. [file elife-83157-fig4-data1.xlsx]

## Sheet: Figure 3-source data 4
Related to Figure 4C-D
condition	vent green	vent yellow	vent orange	nonvent green	nonvent yellow	nonvent orange
NIN	3	0	0	1	0	1		Manual counts for each centrosome colour in each region (vent vs nonvent) for each image of each shRNA treatment condition (NIN & SCRAM)
NIN	4	1	0	2	0	1
NIN	2	0	0	3	0	1
NIN	1	1	2	6	0	1
NIN	14	0	0	5	0	1
NIN	6	2	0	25	1	11
NIN	0	0	1	2	0	2
NIN	1	0	0	1	2	3
NIN	0	1	0	0	1	2
NIN	4	0	0	3	2	1
SCRAM	0	0	2	0	5	0
SCRAM	0	0	1	7	0	1
SCRAM	1	1	0	4	0	0
SCRAM	3	1	0	5	1	0
SCRAM	3	1	0	0	5	1
SCRAM	0	1	1	22	0	0
SCRAM	0	1	0	4	0	0
