# Supplementary figures and images for: Asymmetric inheritance of centrosomes maintains stem cell properties in human neural progenitor cells
Source: eLife journal article supplement (doi:10.7554/elife.83157), 2023-10-26

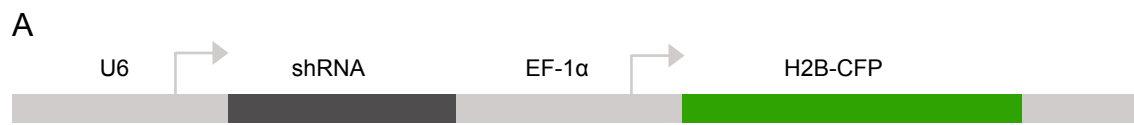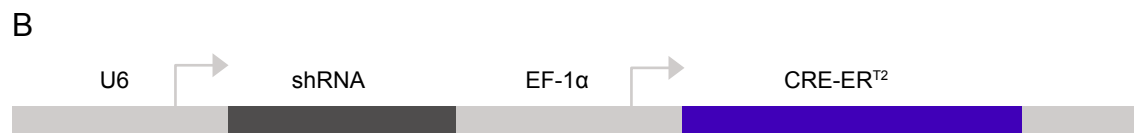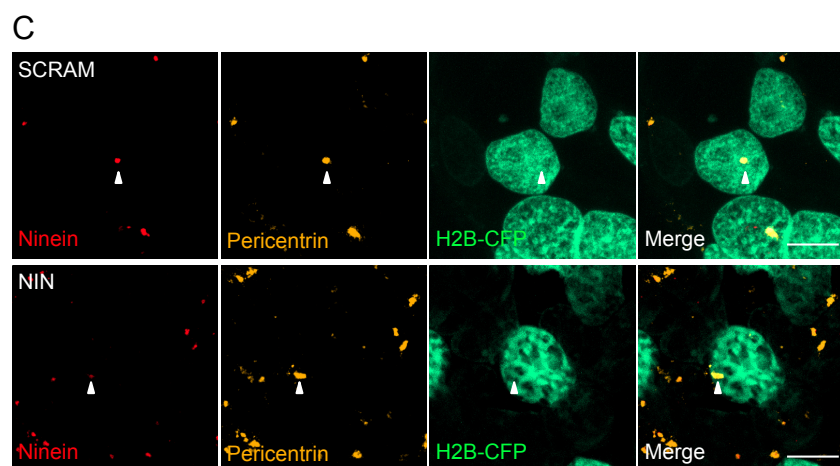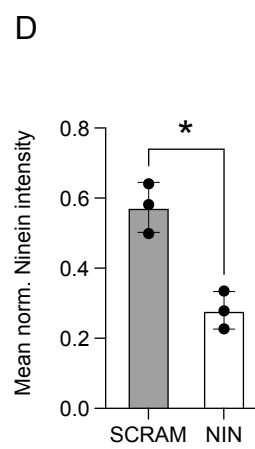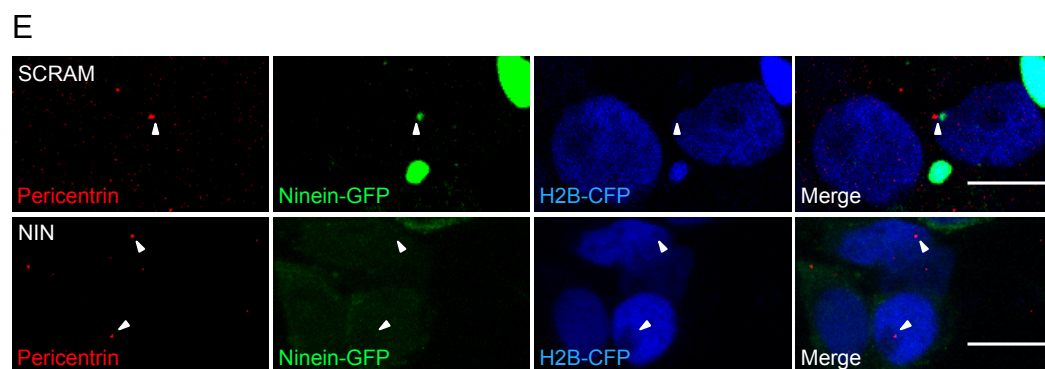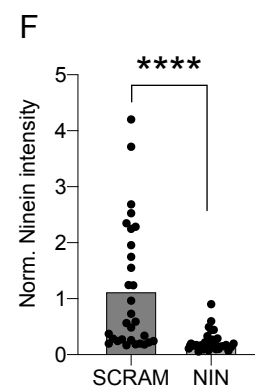

Supplement: supp [file elife-83157-supp-v1.zip]

A

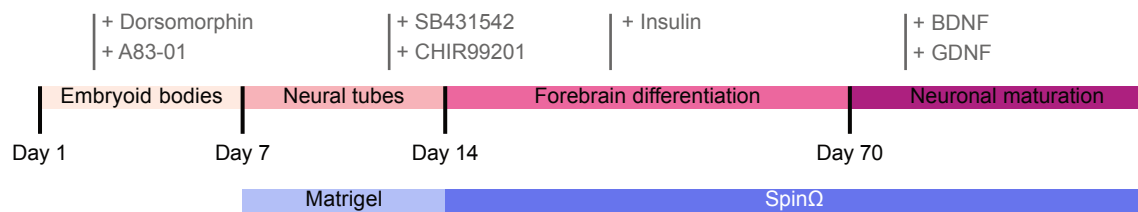

B

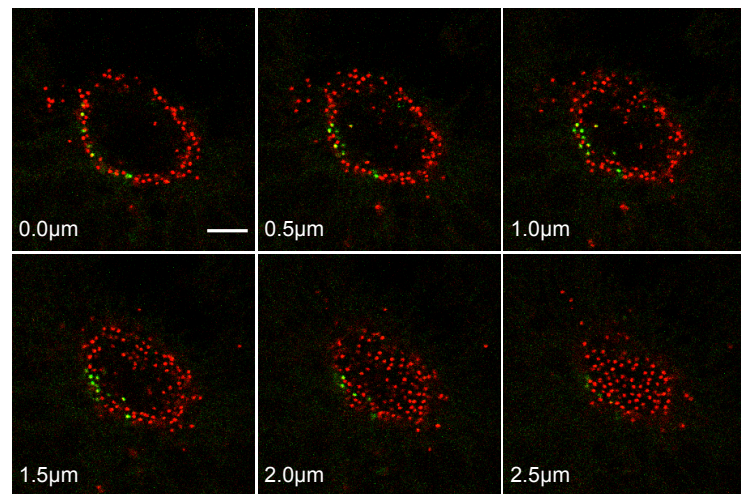

C

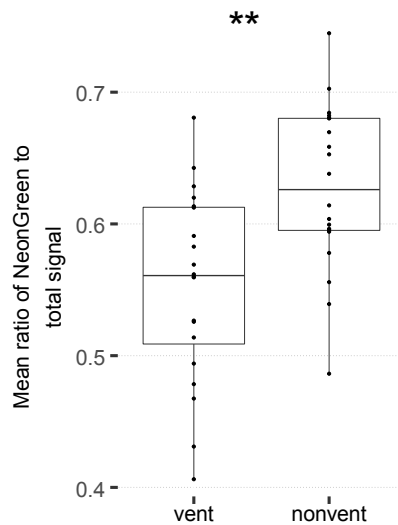

D

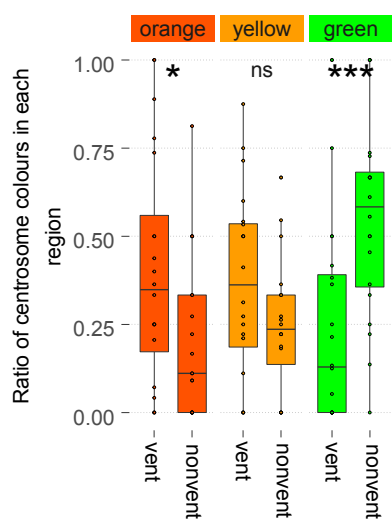

E

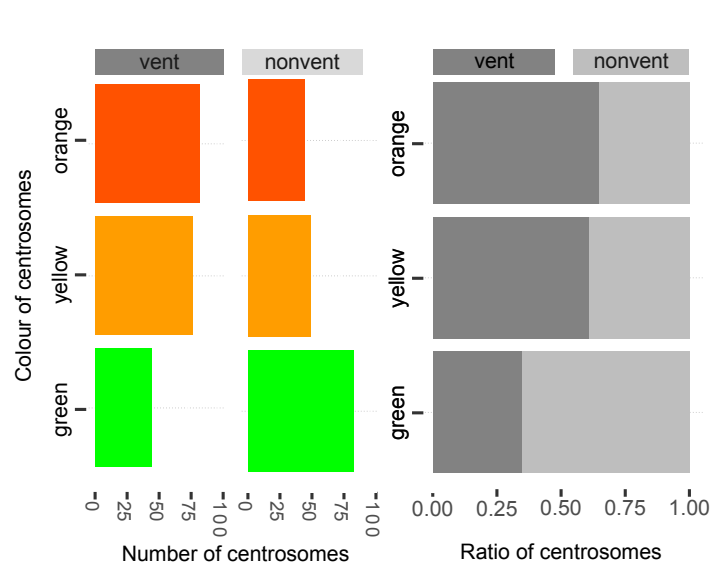

F

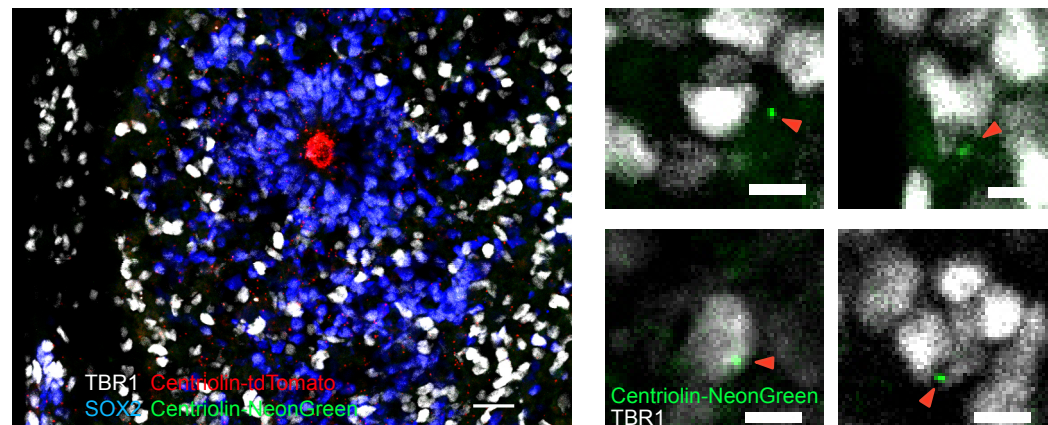

Supplement: supp [file elife-83157-supp-v1.zip]

A

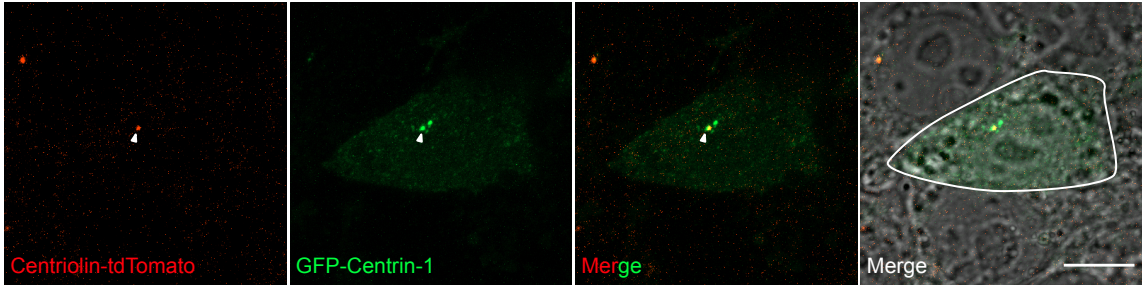

Supplement: supp [file elife-83157-supp-v1.zip]
